# Supplementary material
Source: ML conference proceedings conference paper supplement (https://openaccess.thecvf.com/content/WACV2024/html/Ehret_A_Generic_and_WACV_2024_paper.html)
Supplement: Supplementary file 1 [file Ehret_A_Generic_and_WACV_2024_supplemental.pdf]

# Supplementary material: A generic and flexible regularization framework for NeRFs

Thibaud Ehret Roger Marí Gabriele Facciolo

Université Paris-Saclay, CNRS, ENS Paris-Saclay, Centre Borelli, 91190, Gif-sur-Yvette, France

thibaud.ehret@ens-paris-saclay.fr

## 1. Additional visual results

We present additional visual results comparing RegNeRF [2] to the proposed regularization framework (with both depth regularization and normals regularization) in Fig. 1.

## 2. Parameters study for surface estimation

In Fig. 2, we show the impact of the two parameters controlling the loss, namely the regularization weight  $\lambda_{curv}$  and clipping value  $\kappa_{curv}$ , on a specific example of the DTU dataset [1] using Gaussian curvature. A very small weight and a strong clipping ( $\lambda_{curv} = 0.0001$  and  $\kappa_{curv} = 1$ ) leads to barely no regularization as expected. On the contrary, a large weight with little clipping ( $\lambda_{curv} = 0.001$  and  $\kappa_{curv} = 10$ ) learns a sort of envelope of the surface. The most interesting results, however, are obtained with intermediate parameters. For example,  $\lambda_{curv} = 0.0005$  and  $\kappa_{curv} = 5$  produces a surface that is both strongly regularized while keeping most of the details. Another interesting result is that of  $\lambda_{curv} = 0.001$  and  $\kappa_{curv} = 5$ , which leads to a Cubist-style surface, with little details and exaggerated edges. Such models might be interesting to learn a surface that can be represented by a mesh with few triangles or for deriving a piece-wise developable surface [3]. Note also how the regularization has a tendency to fill small gaps (for example the mouth of the bunny is completely regularized with parameters  $\lambda_{curv} = 0.0001$  and  $\kappa_{curv} = 10$ ). This shows the importance of clipping to preserve small details and the limits of such type of regularization. This study was done using VolSDF [4].

## References

- [1] Rasmus Jensen, Anders Dahl, George Vogiatzis, Engin Tola, and Henrik Aanaes. Large scale multi-view stereopsis evaluation. In *Proceedings of the IEEE conference on computer vision and pattern recognition*, pages 406–413, 2014. 1
- [2] Michael Niemeyer, Jonathan T Barron, Ben Mildenhall, Mehdi SM Sajjadi, Andreas Geiger, and Noha Radwan. RegNeRF: Regularizing neural radiance fields for view synthesis from sparse inputs. In *Proceedings of the IEEE/CVF Conference on Computer Vision and Pattern Recognition (CVPR)*, 2022. 1, 2
- [3] Silvia Sellán, Noam Aigerman, and Alec Jacobson. Developability of heightfields via rank minimization. *ACM Trans. Graph.*, 39(4):109, 2020. 1
- [4] Lior Yariv, Jiatao Gu, Yoni Kasten, and Yaron Lipman. Volume rendering of neural implicit surfaces. *Advances in Neural Information Processing Systems*, 34, 2021. 1

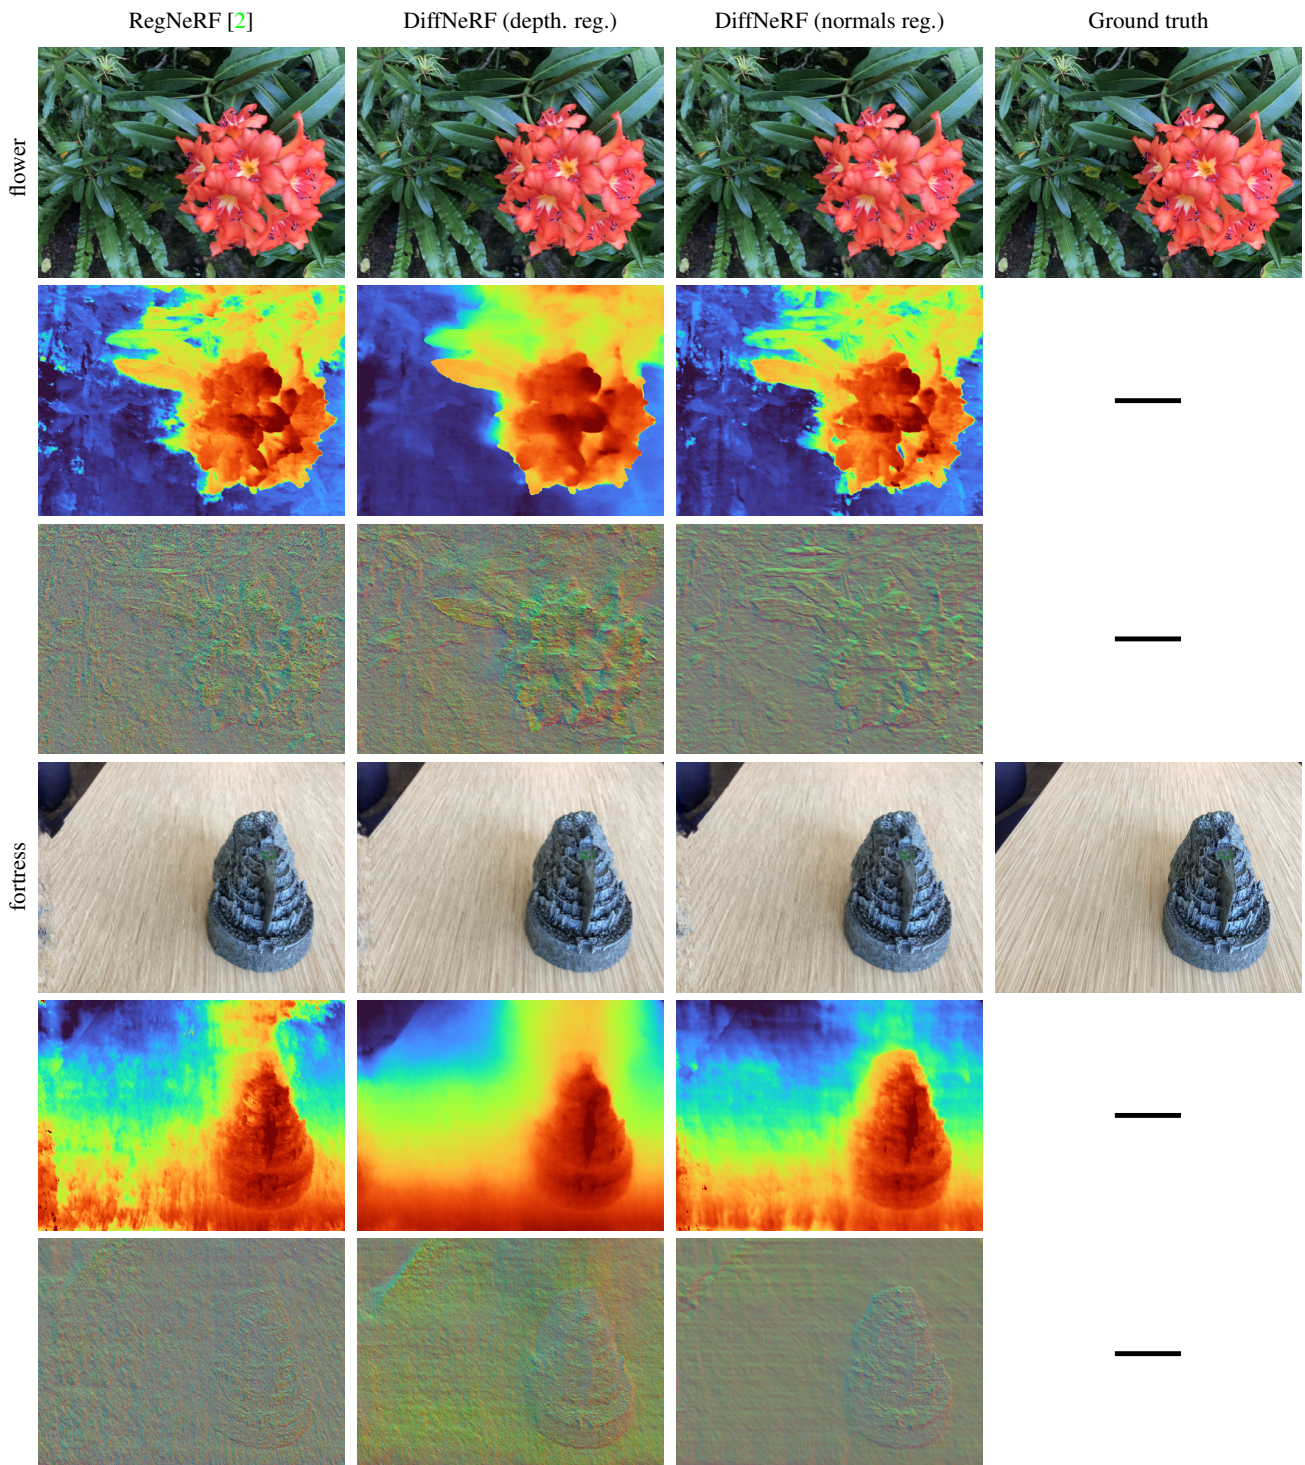

Figure 1. Visual examples of novel view synthesis for the *flower* (top) and *fortress* (bottom) sequences of the LLFF dataset after training with three views.

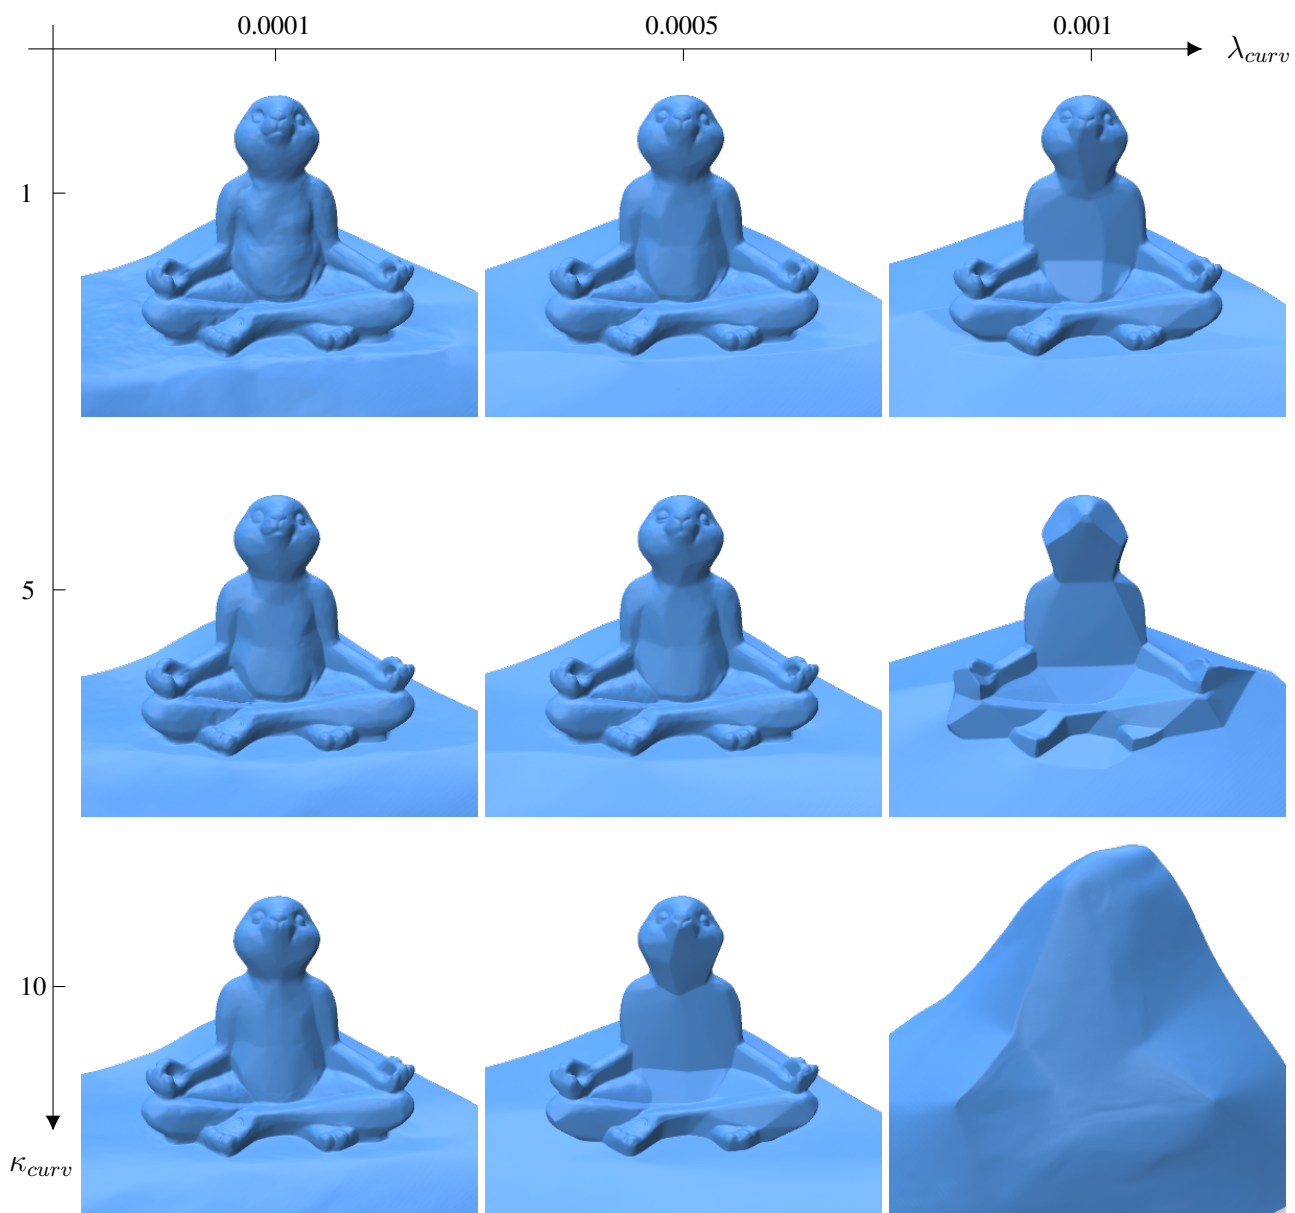

Figure 2. Study of the impact of the two parameters controlling the strength of the regularization, i.e. the regularization weight  $\lambda_{curv}$  and the clipping value  $\kappa_{curv}$ , on the scene 110 of the DTU dataset. While intermediate parameters, such as  $\lambda_{curv} = 0.0005$  and  $\kappa_{curv} = 5$ , provide a good balance between detail preservation and surface smoothness, strong regularization can produce surprising surfaces such as the Cubist-like representation given by  $\lambda_{curv} = 0.001$  and  $\kappa_{curv} = 5$ . These results were computed using the Gaussian curvature. Results best seen zoomed.
